# Supplementary material
Source: PubMed Central journal article supplement (PMC7675099)
Supplement: jamacardiol-e202822-s001.pdf [file jamacardiol-e202822-s001.pdf]

## Supplementary Online Content

Gaziano TA, Fonarow GC, Velazquez EJ, Morrow DA, Braunwald E, Solomon SD. Cost-effectiveness analysis of sacubitri-valsartan in hospitalized patients who have heart failure with reduced ejection fraction. *JAMA Cardiol*. Published online August 12, 2020. doi:10.1001/jamacardio.2020.2822

**eTable 1.** Comparison of Model Results With Trial and Community-based Estimates

**eTable 2.** Derivation of Number of Persons per Year Eligible for Heart Failure Treatment

**eTable 3.** Annual Budget Impact at the Individual and National Levels

**eFigure 1.** One-Way Sensitivity Analyses Comparing Sacubitril/Valsartan Inpatient Versus Enalapril Inpatient Then Sacubitril/Valsartan as an Outpatient

**eFigure 2.** One-Way Sensitivity Analyses Comparing Enalapril Throughout Versus Enalapril Inpatient Then Sacubitril/Valsartan as an Outpatient

### eReferences

This supplementary material has been provided by the authors to give readers additional information about their work

**eTable 1.** Comparison of Model Results With Trial and Community-Based Estimates.

|                     | 2-months |            | 27-months |             | 5-year |                                     |
|---------------------|----------|------------|-----------|-------------|--------|-------------------------------------|
|                     | Model    | PIONEER-HF | Model     | PARADIGM-HF | Model  | Community Cohorts <sup>(1, 2)</sup> |
| HF hospitalizations | 14.20%   | 13.80%     | 62%       | 57.42%      | NA     | NA                                  |
| Mortality           | 3.40%    | 3.00%      | 21.28%    | 19.80%      | 43%    | 42%-54%                             |

1. Benjamin et al 2019 AHA Stats, Circ. 2. Roger, VL Epidemiology of Heart Failure, Circ Research

**eTable 2. Derivation of Number of Persons per Year Eligible for Heart Failure Treatment**

| Derivation of number of persons per year eligible                                    |     |                |  | Source        |
|--------------------------------------------------------------------------------------|-----|----------------|--|---------------|
| New HF diagnosis per year                                                            |     | 1,000,000      |  | AHA Stats     |
| New HF <sub>rEF</sub> Annual Diagnosis                                               | 50% | 500,000        |  | AHA Stats     |
| Admit rate                                                                           | 75% |                |  |               |
| Newly Diagnosed HF <sub>rEF</sub> with inpatient admission                           |     | 375,000        |  |               |
|                                                                                      |     |                |  |               |
| <b>Total HF Admissions</b>                                                           |     | 900,000        |  | AHA Stats     |
| HF Admissions for HF <sub>rEF</sub>                                                  | 50% | 450,000        |  | AHA Stats     |
| Newly Diagnosed HF <sub>rEF</sub> with inpatient admission                           |     | -375,000       |  |               |
| HF Admissions for HF <sub>rEF</sub> prior diagnosis                                  |     | 75,000         |  |               |
| % not on S/V                                                                         | 90% |                |  |               |
| Previously Diagnosed HF <sub>rEF</sub> admission not on S/V                          |     | 67,500         |  |               |
| <b>Total of Newly and Previously Diagnosed HF<sub>rEF</sub> admission not on S/V</b> |     | <b>442,500</b> |  |               |
| <b>Exclusions</b>                                                                    |     |                |  | <b>Source</b> |
| Hospice                                                                              | 4%  | -17700         |  | PARADIGM      |
| Inotropes/VAD                                                                        | 1%  | -4425          |  |               |
| ACEI/ARB CI                                                                          | 7%  | -30975         |  |               |
| Low BP                                                                               | 5%  | -22125         |  |               |
| <b>Total persons per year eligible</b>                                               |     | <b>367,275</b> |  |               |

**Table 3. Annual Budget Impact at the Individual and National Levels**

| Individual Level                   |                             |                             |                        |                            |
|------------------------------------|-----------------------------|-----------------------------|------------------------|----------------------------|
| Strategy                           | Survival Rate               | Cost                        | Costs/Month Alive      | Annual Savings*            |
| Enalapril indefinitely             | 0.9253                      | \$17,390                    | \$1,566                |                            |
| Enalapril 2 months, S/V outpatient | 0.9316                      | \$17,893                    | \$1,601                | <b>-\$420</b>              |
| S/V inpatient initiation           | 0.9332                      | \$17,118                    | \$1,529                | <b>\$449</b>               |
| National Level                     |                             |                             |                        |                            |
| 100% Uptake                        |                             |                             |                        |                            |
| Strategy                           | Hospital Costs** (Millions) | Medication Costs (Millions) | Total Costs (Millions) | Annual Savings† (Millions) |
| Enalapril indefinitely             | \$3,456                     | \$33                        | \$3,489                |                            |
| Enalapril 2 months, S/V outpatient | \$2,525                     | \$1,195                     | \$3,720                | <b>-\$231</b>              |
| S/V inpatient initiation           | \$1,967                     | \$1,427                     | \$3,396                | <b>\$92</b>                |
| 50% Uptake                         |                             |                             |                        |                            |
| Enalapril indefinitely             | \$3,456                     | \$33                        | \$3,489                |                            |
| Enalapril 2 months, S/V outpatient | \$2,990                     | \$614                       | \$3,604                | <b>-\$115</b>              |
| S/V inpatient initiation           | \$2,712                     | \$730                       | \$3,442                | <b>\$47</b>                |

\* Per year alive compared to Enalapril indefinitely.

\*\* Hospital costs includes both HF and non-HF admissions. Costs for hospitalizations include both reimbursement rate

† Compared to Enalapril indefinitely.

\* Per year alive compared to Enalapril indefinitely.

\*\* Hospital costs includes both HF and nonHF admissions. Costs for hospitalizations include both reimbursement rates of Medicare and private insurance in proportion to the population.

†Compared to Enalapril indefinitely.

**eFigure 1.** One-Way Sensitivity Analyses Comparing Sacubitril/Valsartan Inpatient Versus Enalapril Inpatient Then Sacubitril/Valsartan as an Outpatient

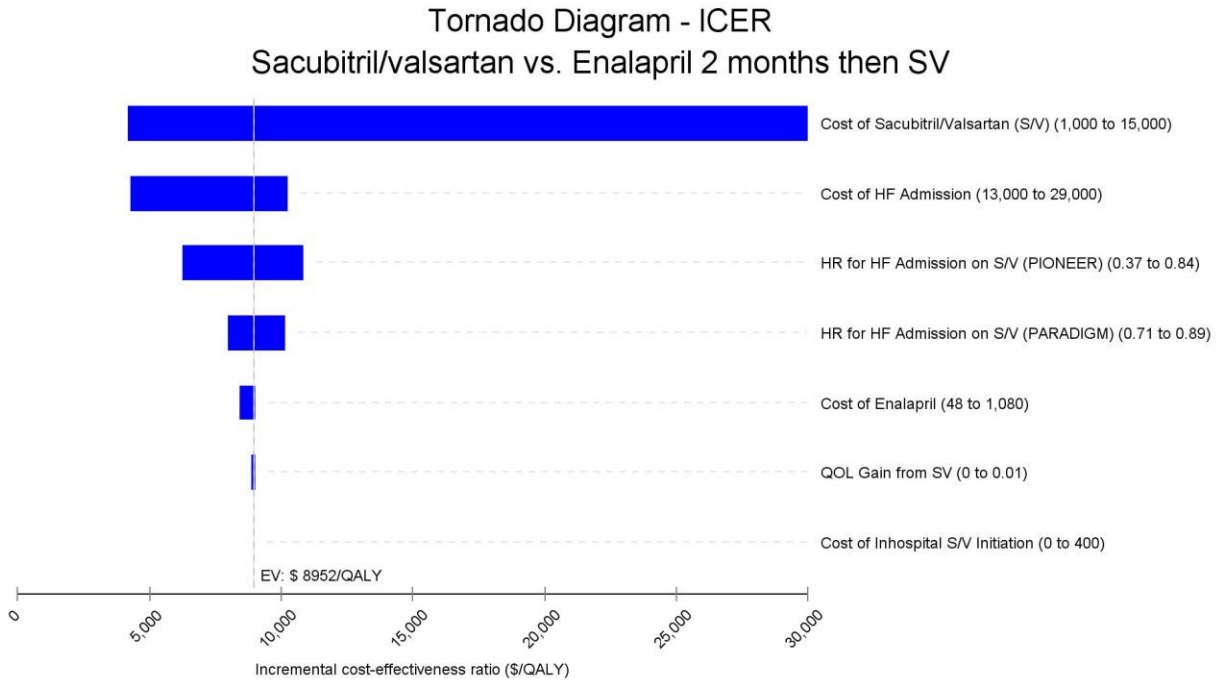

**eFigure 2.** One-Way Sensitivity Analyses Comparing Enalapril Throughout Versus Enalapril Inpatient Then Sacubitril/Valsartan as an Outpatient

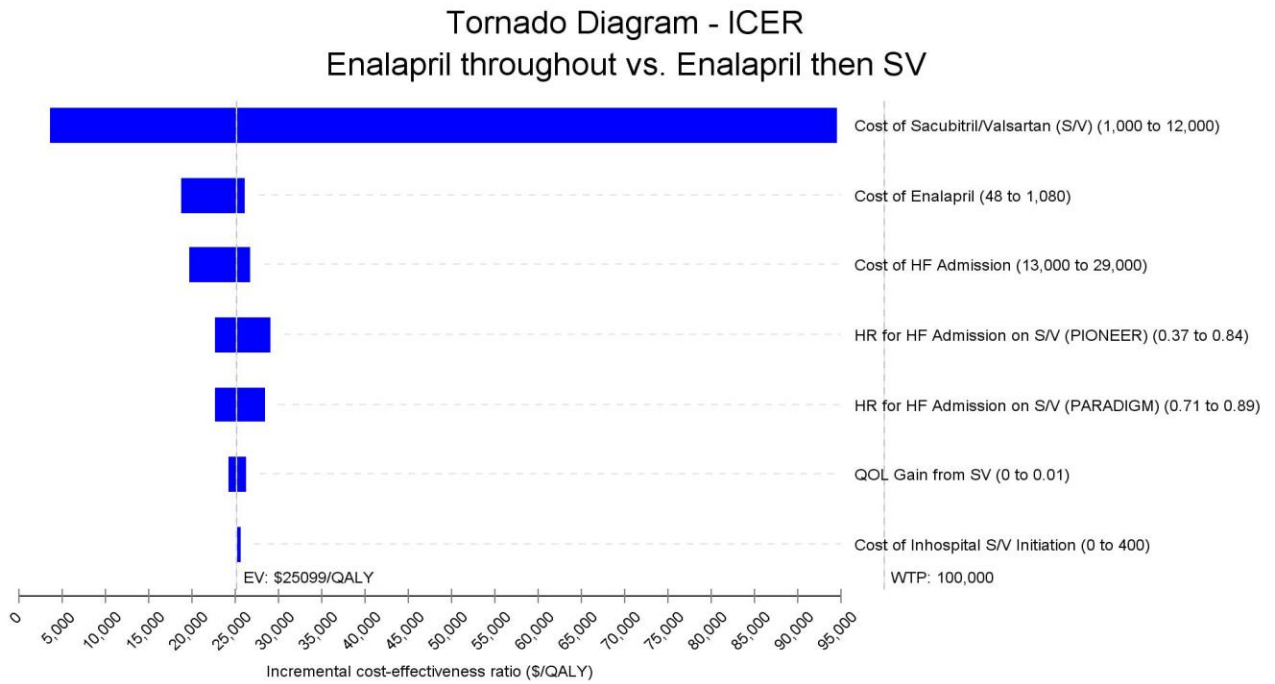

## eReferences

1. Benjamin JE, Muntner SP, Alonso WA, Bittencourt PM, Callaway MC, Carson RA, et al. Heart Disease and Stroke Statistics—2019 Update: A Report From the American Heart Association. *Circulation*. 2019;139(10):e56-e66.
2. Roger LV. Epidemiology of Heart Failure. *Circulation research*. 2013;113(6):646-59.
